# Supplementary material
Source: bioRxiv or medRxiv preprint supplement (https://medrxiv.org/highwire/filestream/72027/field_highwire_adjunct_files/0/2020.02.10.20021741-1.pdf)
Supplement: Supplementary file [file 2020.02.10.20021741-1.pdf]

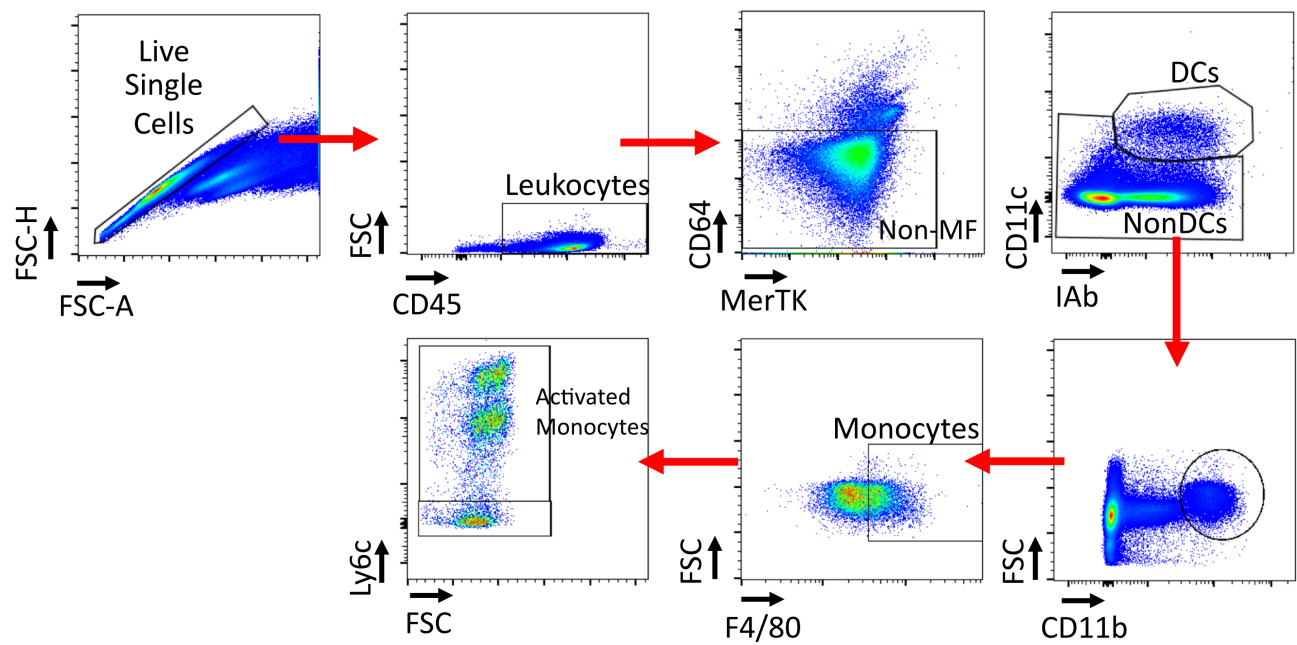

**Supplemental Figure 1: Gating strategy for dendritic cells and monocytes**

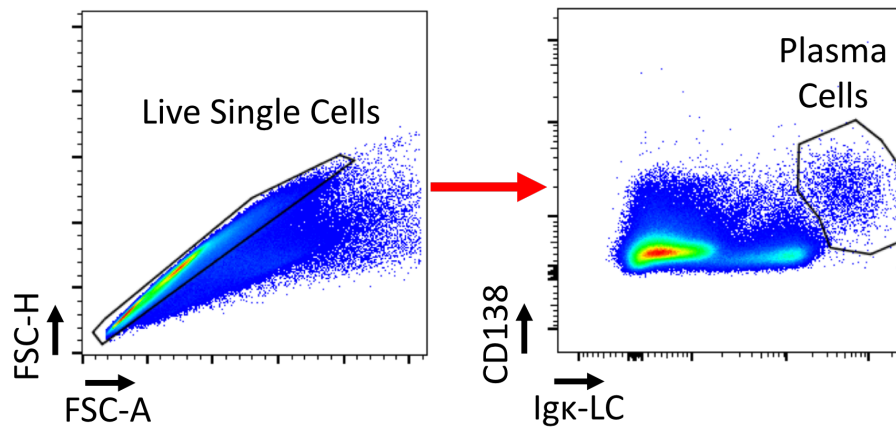

**Supplemental Figure 2:** Gating strategy for plasma cells

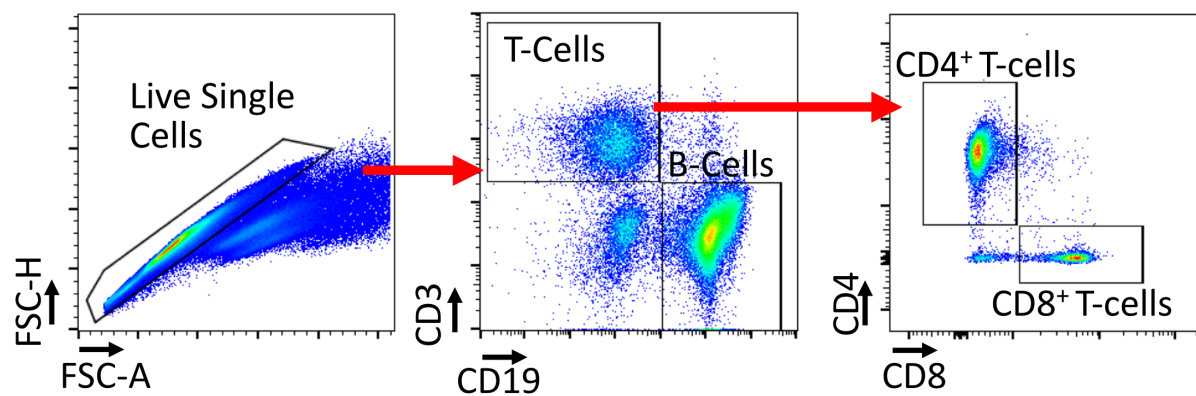

**Supplemental Figure 2:** Gating strategy for B-cells and T-cells.

|                           | SLE Median<br>[IQR] | Control<br>Median [IQR] |
|---------------------------|---------------------|-------------------------|
| <b>Demographics</b>       |                     |                         |
| Age, years                | 29.5 [20, 36.75]    | 36.75 [29, 39]          |
| Race, # Caucasian         | 5 (83)              | 4 (100)                 |
| Ethnicity, # Hispanic     | 1 (16.7)            | 1 (25)                  |
| Sex, # female             | 4 (67)              | 4 (100)                 |
| Blood Pressure            | 115.5 (105.5-       | 127.75 (126-            |
| Blood Pressure            | 70.5 (63.5-81.25)   | 73 (71-81.25)           |
| BMI                       | 22.1 (21.8-36.2)    | 26 (22.8-26.9)          |
| Creatinine                | 0.71 (0.63-0.92)    | N/A                     |
| <b>SLE Manifestation</b>  |                     |                         |
| Mucocutaneous, #          | 4 (66.7)            | N/A                     |
| Musculoskeletal, #        | 5 (83.3)            | N/A                     |
| Serositis, # ever         | 1 (16.7)            | N/A                     |
| Hematologic, # ever       | 1 (16.7)            | N/A                     |
| Renal, # ever             | 2 (33.3)            | N/A                     |
| Anti-dsDNA positivity,    | 4 (66.7)            | N/A                     |
| Low complement, #         | 2 (33)              | N/A                     |
| SLEDAI, score             | 2 [1, 4]            | N/A                     |
| SLICC, score              | 0 [0, 1]            | N/A                     |
| Hypertension              | 0 (0)               |                         |
| <b>Current medication</b> |                     |                         |
| Hydroxychloroquine,       | 6 (100)             | N/A                     |
| Mycophenolate, #          | 2 (33.3)            | N/A                     |
| Corticosteroids, #        | 2 (33.3)            | N/A                     |
| ACE Inhibitors            | 1 (16.7)            |                         |

**Supplemental Table 1: Clinical features of SLE patients and controls studies with mass spectrometry.**

|                           | SLE Median [IQR]<br>or # (%) | Control Median<br>[IQR]<br># (%) |
|---------------------------|------------------------------|----------------------------------|
| <b>Demographics</b>       |                              |                                  |
| Age, years                | 46 [44, 50]                  | 50 [36, 50]                      |
| Race, # Caucasian         | 4 (66.7)                     | 4 (100)                          |
| Ethnicity, # Hispanic     | 0 (0)                        | 0 (0)                            |
| Sex, # female             | 6 (100)                      | 3 (75)                           |
| Blood Pressure            | 120.5 (111.25-               | 123.75 (100-125)                 |
| Blood Pressure            | 73 (66.75-74.75)             | 73 (57-75)                       |
| BMI                       | 22.1 (21.8-36.2)             | 27.5(25.9-30.7)                  |
| Creatinine                | 0.71 (0.63-0.92)             | N/A                              |
| <b>SLE Manifestation</b>  |                              |                                  |
| Mucocutaneous, #          | 4 (66.7)                     | N/A                              |
| Musculoskeletal, #        | 5 (83.3)                     | N/A                              |
| Serositis, # ever         | 1 (16.7)                     | N/A                              |
| Hematologic, # ever       | 1 (16.7)                     | N/A                              |
| Renal, # ever             | 2 (33.3)                     | N/A                              |
| Anti-dsDNA positivity,    | 4 (66.7)                     | N/A                              |
| Low complement, #         | 2 (33)                       | N/A                              |
| SLEDAI, score             | 2 [1, 4]                     | N/A                              |
| SLICC, score              | 0 [0, 1]                     | N/A                              |
| Hypertension              | 0 (0)                        |                                  |
| <b>Current medication</b> |                              |                                  |
| Hydroxychloroquine,       | 6 (100)                      | N/A                              |
| Mycophenolate, #          | 2 (33.3)                     | N/A                              |
| Corticosteroids, #        | 2 (33.3)                     | N/A                              |
| ACE Inhibitors            | 1 (16.7)                     |                                  |

**Supplementary Table 2: Clinical features of SLE patients and controls studied with HPLC.**
